# Supplementary material for: Visible light induced photobleaching of methylene blue over melamine-doped TiO2 nanocatalyst
Source: Royal Society of Chemistry journal article supplement (doi:10.1039/c0nr00089b), 2010-01-01

Supplementary Material (ESI) for Nanoscale

## Visible light induced photobleaching of methylene blue over melamine doped TiO<sub>2</sub> nanocatalyst

Jurate Virkutyte,\*† Babita Baruwati and Rajender S. Varma\*<sup>a</sup>

Sustainable Technology Division, National Risk Management Research Laboratory,  
Environmental Protection Agency, 26 West M. L. K. Drive, MS 443, Cincinnati, Ohio 45268  
USA . Fax: 5135697677; Tel:5134872701; E-mail: Varma.Rajender@epa.gov  
†NRC Research Associate, E-mail:Virkutyte.Jurate@epa.gov

Figure S1. UV plot for the visible light photobleaching of methylene blue over *N*-doped nano TiO<sub>2</sub>.

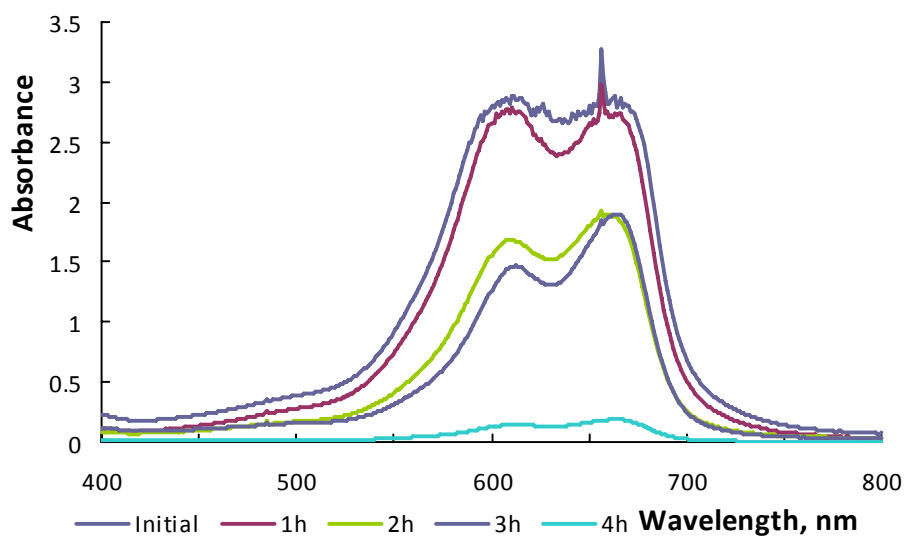

Supplement: c0nr00089b.pdf [file c0nr00089b.pdf]
